# Supplementary material for: Facile synthesis of high-performance SiO2@Au core–shell nanoparticles with high SERS activity
Source: Royal Society of Chemistry journal article supplement (doi:10.1039/c8ra05213a), 2018-01-01
Supplement: c8ra05213a1.pdf [file c8ra05213a1.pdf]

## Supporting Information

### Facile synthesis of high-performance SiO<sub>2</sub>@Au core-shell nanoparticles with high SERS activity

Keli Wang,<sup>a,b,1</sup> Yanping Wang,<sup>b,1</sup> Chongwen Wang,<sup>b,c,\*</sup> Xiaofei Jia,<sup>b</sup> Jia Li,<sup>b</sup> Rui Xiao,<sup>a,b,\*</sup> and Shengqi Wang<sup>a,b,\*</sup>

<sup>a</sup>Anhui Medical University, Hefei, 230032, PR China.

<sup>b</sup>Beijing Institute of Radiation Medicine, Beijing 100850, PR China.

<sup>c</sup>College of Life Science, Anhui Agricultural University, Hefei 230036, China.

\*Corresponding author. *Email address:*

*sqwang@bmi.ac.cn* (S. Wang),

*ruixiao203@sina.com* (R. Xiao),

*wangchongwen1987@126.com* (C. Wang).

## Experimental section

### 1.1 Materials and chemicals

Chlorauric acid tetrahydrate (HAuCl<sub>4</sub>·4H<sub>2</sub>O), trisodium citrate dehydrate, and ammonia solution (28%) were purchased from Sinopharm Chemical Reagent Co., Ltd., (China). Tetraethoxysilane (TEOS), polyethyleneimine branched (PEI, MW 25 kDa), 5,5-dithiobis-(2-nitrobenzoic acid) (DTNB), N-(3-dimethylaminopropyl)-N'-ethylcarbodiimide hydrochloride (EDC), MES monohydrate, N-hydroxysuccinimide (NHS), sodium borohydride (NaBH<sub>4</sub>), polyvinylpyrrolidone (PVP, MW 40 kDa), Human immunoglobulin M (IgM), goat anti-human IgM, donkey anti-goat immunoglobulin G (IgG), and bovine serum albumin (BSA) were purchased from Sigma-Aldrich (USA). The nitrocellulose (NC) membrane (Hi-flow plus HF135) with 6 μm pore size was obtained from Millipore Corporation (USA). The sample pad, conjugate pad, and absorbent pad were obtained from GE Healthcare (UK). Ultrapure water purified with a Millipore Milli-Q system (18.2 MΩ·cm<sup>-1</sup>) was used to prepare the aqueous solutions. All chemicals used in this study were analytical reagent grade.

### 1.2. Instruments

The morphologies of the SiO<sub>2</sub>@Au NPs were characterized by Hitachi H-7650 microscope at an accelerating voltage of 80 kV. The HRTEM imaging of monodisperse SiO<sub>2</sub>@Au NPs were characterized by Philips Tecnai G2 F20 microscope at an accelerating voltage of 200 kV. Elemental mapping images were recorded by energy-dispersive X-ray spectroscopy (EDS) using another JEOL JEM-2100 electron microscope equipped with a STEM unit. Scanning electron microscopy

(SEM) images were obtained with a JEOL JSM-7001F microscopy at an accelerating voltage of 5 kV. The XRD patterns of products powder were characterized on investigated on a Japan Rigaku D/max 2550 VB/PC rotation anode X-ray diffractometer. UV-visible spectra of the samples were measured in the range of 200-800 nm using a Shimadzu 2600 spectrometer. Zeta potential of samples were recorded by a dynamic light scattering with Zetasizer Nano ZS (Malvern, UK). All the measurements were performed at room temperature. Raman signals from the test zone of the SERS-based LFA strips were recorded on a Renishaw inVia plus Raman system with an excitation laser at 785 nm. Incident radiation was coupled to an Olympus BX51 optical microscope and focused to a 2  $\mu\text{m}$  diameter spot through a 50 $\times$  objective. The data acquisition time at each spot was 5 s, and the peak intensities of the samples were normalized with respect to the silicon wafer at 520  $\text{cm}^{-1}$ .

### **1.3. Synthesis of monodispersed SiO<sub>2</sub> NPs**

Monodispersed SiO<sub>2</sub> NPs were prepared according to a modified Stöber method. Typically, 4 mL of ammonia solution and 6 mL of deionized water were added to 100 mL ethanol under magnetic stirring (600 rpm/min). Subsequently, 4 mL of TEOS were added into the above mixture solution, and the reaction was kept at room temperature for 4h. Finally, the resulting SiO<sub>2</sub> NPs were centrifuged and redispersed in 20 mL of ethanol.

### **1.4. Synthesis of SiO<sub>2</sub>@PEI-Au seed NPs**

The SiO<sub>2</sub>@PEI NPs were synthesized through a PEI self-assembly process under sonication condition. First, 0.5 g PEI was dissolved in 100 mL of deionized water by ultrasonication for 10 min. Next, 0.1 mL of prepared SiO<sub>2</sub> NPs (10 mg/mL) was dispersed in the PEI solution under sonication at room temperature for 30 min, during which PEI gradually self-assembled on the silica cores. The obtained SiO<sub>2</sub>@PEI NPs were separated by centrifugation at 7000 rpm for 6 min. After washing three times with deionized water to remove the excess PEI, the PEI-modified SiO<sub>2</sub> particles were mixed with previously prepared small Au NPs (3-5 nm) by sonication for 20 min. The resulting SiO<sub>2</sub>@PEI-Au seed NPs were separated and dispersed in 10 mL ethanol.

### **1.5. Synthesis of high-performance SiO<sub>2</sub>@Au NPs**

5 mg of SiO<sub>2</sub>@PEI-Au seed NPs were dispersed in 100 mL of 0.02 mM HAuCl<sub>4</sub> aqueous solution containing 0.2 wt% PVP and then 1mL of hydroxylammonium chloride (10 mg/mL) was added. The SiO<sub>2</sub>@Au core-shell NPs were obtained within 5 min under sonication. Finally, the products were washed twice with deionized water and finally resuspended in ethanol.

### **1.6. SERS detection of DTNB**

A series of DTNB ethanol solutions with concentrations ranging from 10<sup>-4</sup> M to 10<sup>-11</sup> M was prepared. About 500  $\mu\text{L}$  of DTNB solution of different concentrations was mixed with 10  $\mu\text{L}$  of SiO<sub>2</sub>@Au NPs (1 mg/mL) and incubated under sonication for 1 h. The mixture was separated and

washed three times with ethanol to remove excess DTNB. The precipitate was resuspended in 5  $\mu\text{L}$  of ethanol. The suspension was dropped on a silicon substrate, air dried, and subjected to recording of SERS spectra.

### 1.7. Preparation of $\text{SiO}_2@\text{Au}$ NPs SERS tags

DTNB-labelled  $\text{SiO}_2@\text{Au}$  NPs were prepared by attaching the DTNB molecules on the Au shell. In brief, 100  $\mu\text{L}$  of DTNB ethanol solution (10 mM) was added to 10 mL of the as-prepared  $\text{SiO}_2@\text{Au}$  NPs. The mixture was vigorously sonicated at room temperature for 1 h. The product was centrifuged at 3000 rpm for 6 min to remove the excess DTNB molecules, and the precipitate was redispersed in 1 mL of MES solution (100 mM, pH 6.0). The carboxyl groups of DTNB on the surface of the  $\text{SiO}_2@\text{Au}$  NPs were reacted with a mixture of 100  $\mu\text{L}$  of EDC (10 mM) and 10  $\mu\text{L}$  of NHS (100 mM) for 15 min. The mixture was then added with 5  $\mu\text{L}$  of goat anti-human IgM (2 mg/mL) and shaken for 2 h (800 rpm, 25  $^\circ\text{C}$ ). The nonspecific absorption sites on the  $\text{SiO}_2@\text{Au}$  NPs SERS tags were blocked with 100  $\mu\text{L}$  of BSA (5%, v/v) for 2 h. After separating by centrifugation and washing twice with PBS (10 mM, pH 7.4), the final obtained SERS tags were dispersed in 500  $\mu\text{L}$  of PBS and stored at 4  $^\circ\text{C}$  before use.

### 1.8. Preparation of SERS-based LFA strips

The LFA strip is composed of five parts: a sample pad, a conjugate pad, an NC membrane, an absorbent pad, and a plastic backing card. Each component was fabricated on a plastic backing card, and both ends of the component were overlapped (around 2.5 mm) in sequence to ensure solution migration. A desired volume of the as-prepared  $\text{SiO}_2@\text{Au}$  SERS tags was added to the conjugate pad, which was then dried in an incubator at 37  $^\circ\text{C}$  for 4 h. Donkey anti-goat IgG (1 mg/mL) was sprayed in the control line, and goat anti-human antibody IgM (1 mg/mL) was sprayed in the testing line in the nitrocellulose membrane by the bio-dot spraying-membrane machine at a rate of 1.0  $\mu\text{L}\cdot\text{cm}^{-1}$  and dried for 2 h at 37  $^\circ\text{C}$ . The prepared strips were cut in 3.5 mm width by using a programmable cutter and stored in a sealed falcon tube with desiccant before use.

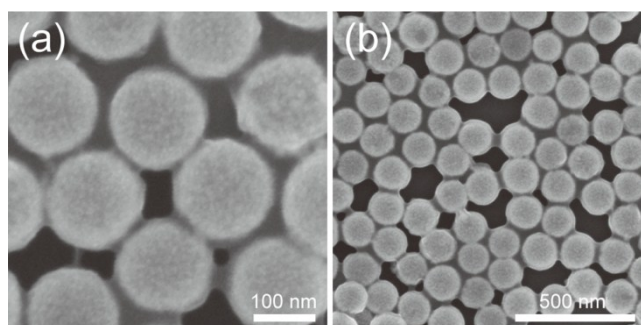

**Fig. S1** SEM images of the fabricated monodisperse  $\text{SiO}_2@\text{Au}$  NPs.

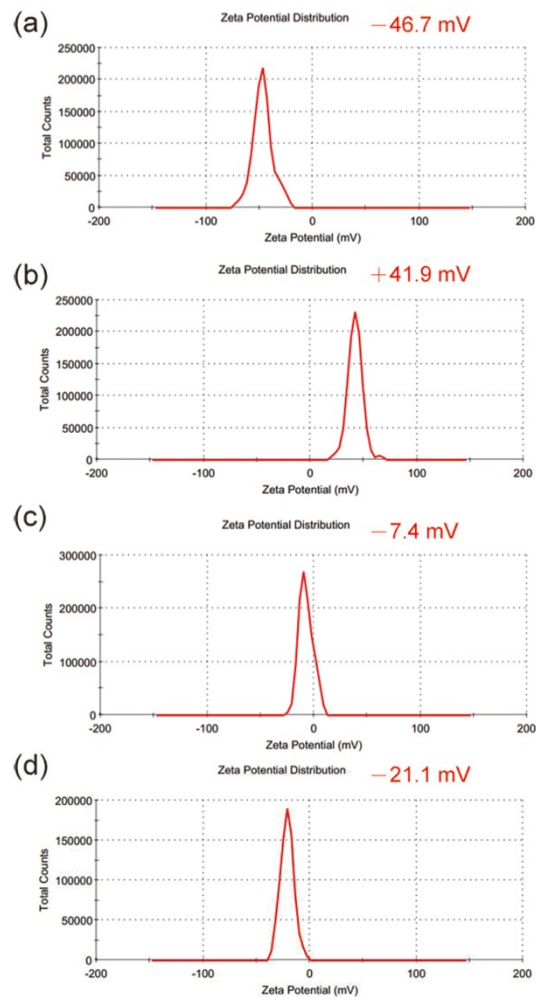

**Fig. S2** Zeta potentials of (a) SiO<sub>2</sub>, (b) SiO<sub>2</sub>@PEI, (c) SiO<sub>2</sub>-Au seed, and (d) SiO<sub>2</sub>@Au NPs in aqueous solution.

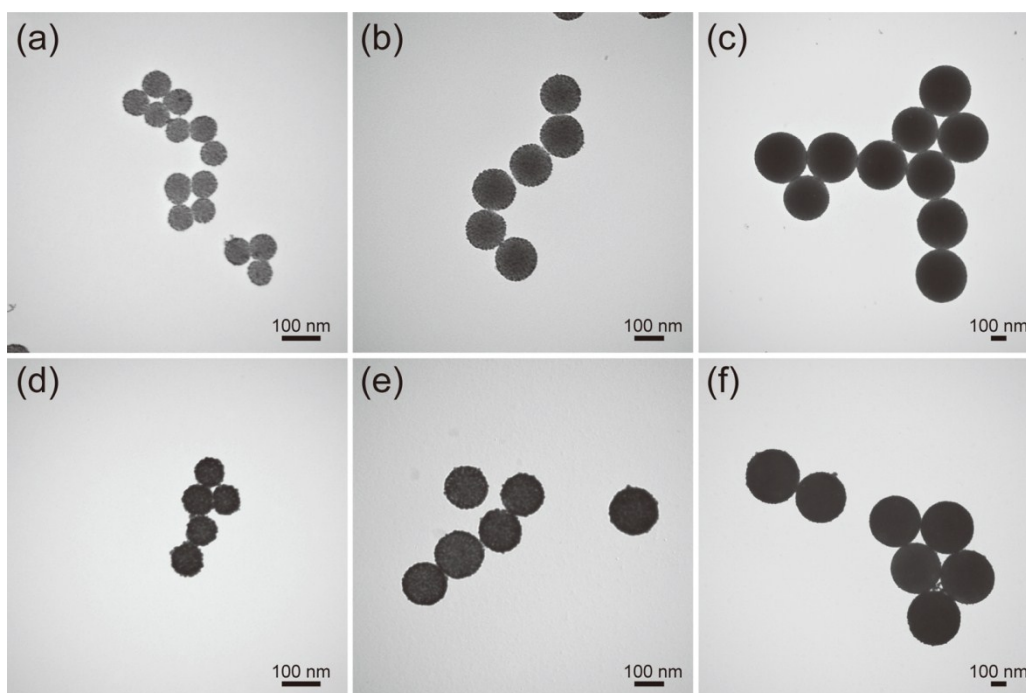

**Fig. S3** TEM images of multiple SiO<sub>2</sub>-Au seed with different sizes: (a) 70 nm, (b) 150 nm, (c) 300 nm, and their corresponding fabricated SiO<sub>2</sub>@Au MNPs (d), (e), and (f) respectively.

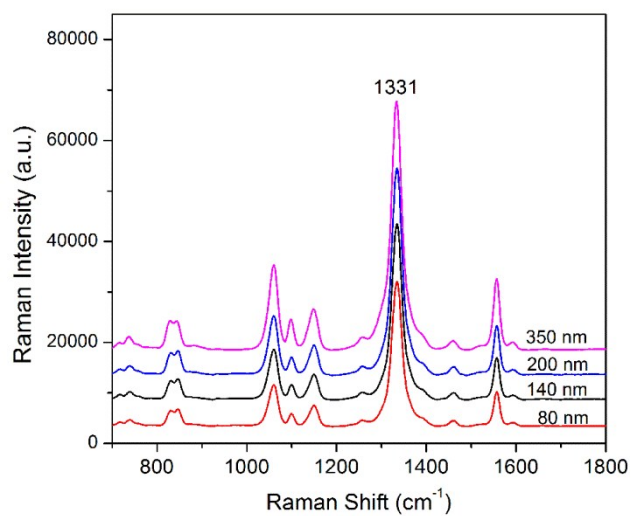

**Fig. S4** SERS spectra of DTNB ( $10^{-5}$  M) adsorbed on SiO<sub>2</sub>@Au NPs with different particle sizes.

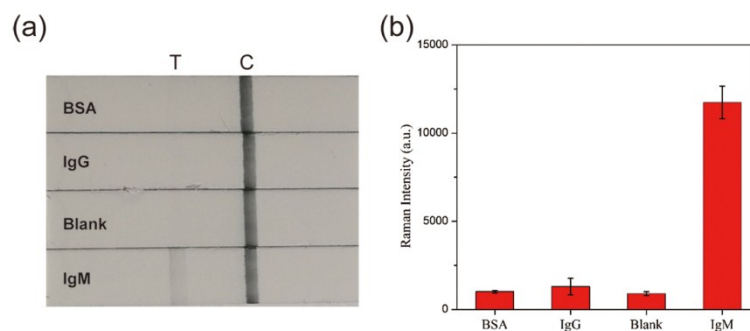

**Fig. S5** Specificity of the SiO<sub>2</sub>@Au tags based SERS-LFIA. (a) Photograph of the SERS-LFIA strip after applying human IgM solution (100 ng/mL) as a positive test, other proteins (1000 ng/mL ) as a negative test, and PBST buffer as a blank control. (b) Raman spectra at the test lines of SERS-LFIA strip. Error bars are the standard deviation of three independent experiments.
